# Supplementary material for: Lab Scale Extracted Conditions of Polyphenols from Thinned Peach Fruit Have Antioxidant, Hypoglycemic, and Hypolipidemic Properties
Source: MDPI journal article supplement (doi:10.3390/foods11010099), 2021-12-31
Supplement: s1 [file s1]

## Supplementary Materials

**Table S1.** Independent factors and levels in the response surface experiment.

| Factors                     | Code | Level |      |      |
|-----------------------------|------|-------|------|------|
|                             |      | -1    | 0    | 1    |
| Ultrasonic time (min)       | A    | 10    | 20   | 30   |
| Ultrasonic temperature (°C) | B    | 30    | 40   | 50   |
| Ultrasonic power (W)        | C    | 120   | 150  | 180  |
| Solid -to-liquid (g/mL)     | D    | 1:8   | 1:10 | 1:12 |

**Table S2.** Physical characteristics of the four macroporous resins.

| Resins | Specific surface area (m <sup>2</sup> /g) | Average pore diameter (nm) | Polarity   |
|--------|-------------------------------------------|----------------------------|------------|
| NKA-9  | 500-550                                   | 10-12                      | Polar      |
| AB-8   | 480-520                                   | 13-14                      | Weak polar |
| D101   | 550-600                                   | 9-10                       | Nonpolar   |
| X-5    | 500-650                                   | 28-30                      | Nonpolar   |

**Table S3.** Linear equations, linear ranges and correlation coefficients for each component of mixed standard.

| Analytes            | Regression equation  | Linear range (µg/mL) | R <sup>2</sup> |
|---------------------|----------------------|----------------------|----------------|
| Neochlorogenic acid | $y=10.1159x+23.0507$ | 10-250               | 0.9994         |
| Chlorogenic acid    | $y=10.3652x-77.8026$ | 10-250               | 0.9987         |
| Catechin            | $y=4.7892x-5.5950$   | 10-500               | 0.9999         |

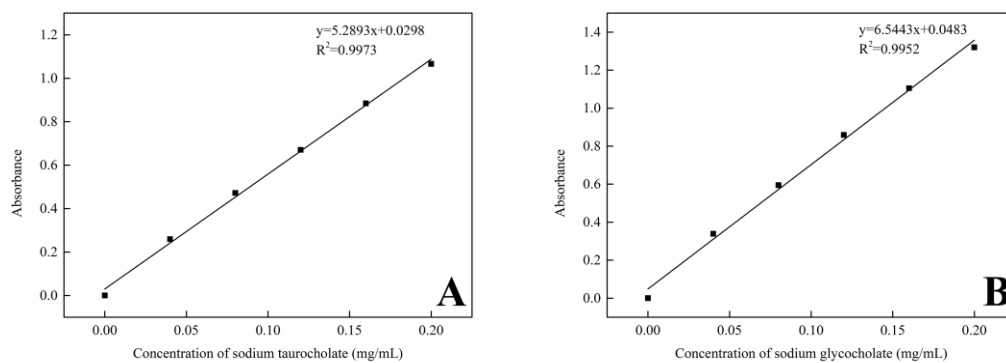

**Figure S1.** Standard curves for sodium taurocholate (A) and sodium glycocholate (B).
